# Supplementary material for: A systematic review of outcomes of wrist arthrodesis and wrist arthroplasty in patients with rheumatoid arthritis
Source: PubMed Central journal article supplement (PMC7897788; doi:10.1177/1753193420953683), 2020-09-17
Supplement: sj-pdf-1-jhs-10.1177_1753193420953683.pdf [file sj-pdf-1-jhs-10.1177_1753193420953683.pdf]

## SUPPLEMENTAL MATERIAL

1  
2  
3  
4  
5  
6  
7  
8  
9  
10  
11  
12  
13  
14  
15  
16  
17  
18  
19  
20  
21  
22  
23  
24  
25

Online Figure S1. A summary of literature search and screening results in accordance with PRISMA guidelines.

Online Table S1 – Search strategies used for MEDLINE, EMBASE, and CENTRAL to generate a list of eligible articles for the review.

Online Table S2 – Summary of general characteristics for each of the studies included, including prosthetic generation, number of cases, number of wrists operated on, and mean follow-up in years.

Online Table S3 – Descriptions of pain scales used by each study and pain assessment summary pre and postoperatively.

Online Table S4 – Summary of the range of motion for each study across flexion/extension, radial/ulnar deviation, and pronation/supination. The values are tallied across each modality of movement (i.e. 30° of flexion and 10° of extension is reported as 40°).

Online Table S5 – Summary of patient satisfaction reported for arthrodesis and arthroplasty.

Online Table S6 – Total number of complications along with a breakdown of each specified type of complication for each study.

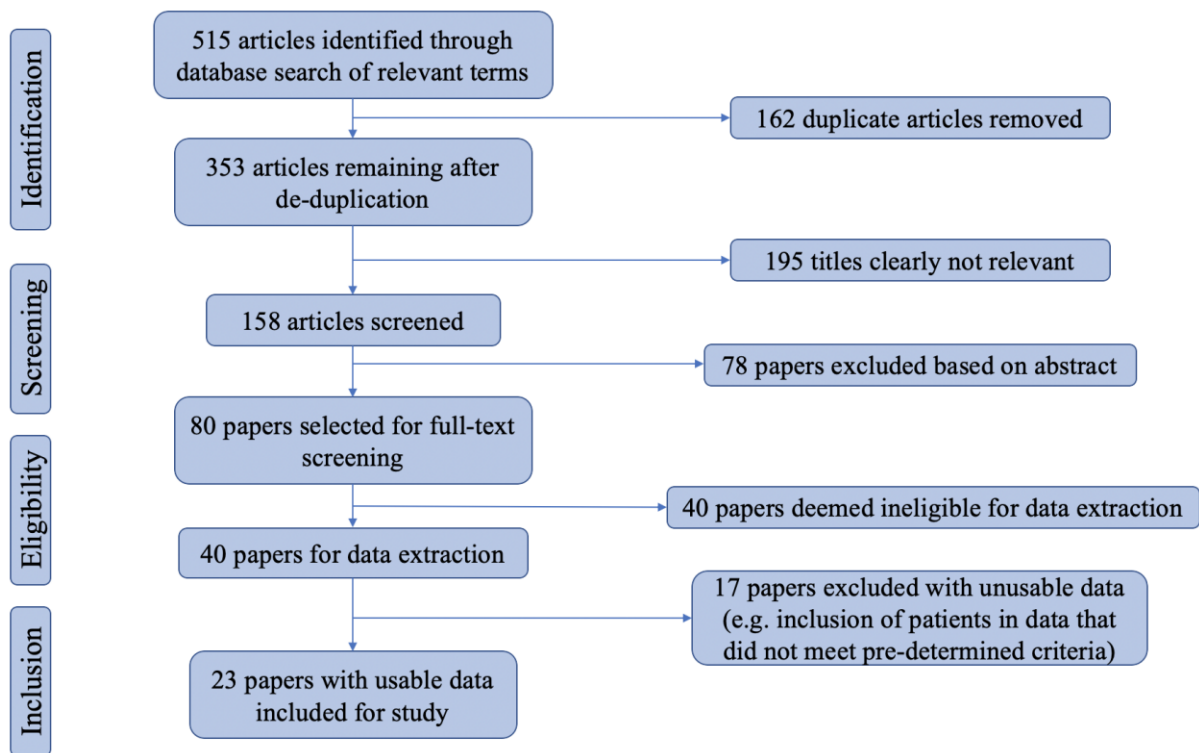

26

27 Online Figure S1. A summary of literature search and screening results in accordance with

28 PRISMA guidelines.

29 Online Table S1. The search strategy used to identify applicable studies in MEDLINE,  
 30 EMBASE, and CENTRAL.

31

| MEDLINE<br>Strategy               | EMBASE<br>Strategy                | Cochrane Library Database<br>Strategy |
|-----------------------------------|-----------------------------------|---------------------------------------|
| 1. Osteoarthritis                 | 1. Osteoarthritis                 | 1. Rheumatoid arthritis               |
| 2. Rheumatoid arthritis           | 2. Rheumatoid arthritis           | 2. Wrist arthrodesis                  |
| 3. Wrist arthroplasty             | 3. Wrist arthroplasty             | 3. Wrist arthroplasty                 |
| 4. Wrist arthrodesis              | 4. Wrist arthrodesis              | 4. Total wrist replacement            |
| 5. Total wrist replacement        | 5. Total wrist replacement        | 5. Total wrist arthroplasty           |
| 6. Total wrist arthroplasty       | 6. Total wrist arthroplasty       | 6. Wrist fusion                       |
| 7. Wrist fusion                   | 7. Wrist fusion                   | 7. 2 or 3 or 4 or 5 or 6              |
| 8. 1 or 2                         | 8. 1 or 2                         | 8. 1 and 7                            |
| 9. 3 or 4 or 5 or 6 or 7          | 9. 3 or 4 or 5 or 6 or 7          |                                       |
| 10. 8 and 9                       | 10. 8 and 9                       |                                       |
| 11. Limit 10 to English text only | 11. Limit 10 to English text only |                                       |
| 12. Limit 11 to humans only       | 12. Limit 11 to humans only       |                                       |

32

Online Table S2. Summary of article characteristics included for study.

| Author (surname), Year  | Study Design                   | Prosthesis (Generation) or technique used | Number of patients (number of wrists) | Intervention                | Mean Age (years) | Follow-up (years) | MINORS Score |
|-------------------------|--------------------------------|-------------------------------------------|---------------------------------------|-----------------------------|------------------|-------------------|--------------|
| Cobb et al 1996         | Prospective Cohort             | Biaxial (3)                               | 52 (64)                               | Arthroplasty                | 57.2             | 6                 | 16           |
| Divelbiss et al 2002    | Prospective Cohort             | Universal (3)                             | 19 (22)                               | Arthroplasty                | 48.1             | 1.64              | 16           |
| Ferreres et al 2011     | Prospective Cohort             | Universal 2 (4)                           | 14 (14)                               | Arthroplasty                | 54               | 5.62              | 13           |
| Figgie, H.E. et al 1988 | Prospective Cohort             | Trispherical (3)                          | 32 (38)                               | Arthroplasty                | 60               | 5                 | 8            |
| Figgie, M. et al 1990   | Retrospective Cohort           | Trispherical (3)                          | 26 (35)                               | Arthroplasty                | 58               | 9                 | 14           |
| Harlingen et al 2014    | Prospective Cohort             | Biaxial (3)                               | 29 (32)                               | Arthroplasty                | 54               | 6                 | 13           |
| Herzberg et al 2012     | Prospective Cohort             | ReMotion (4)                              | 129 (129)                             | Arthroplasty                | 63               | 4                 | 16           |
| Kistler et al 2005      | Retrospective Cohort           | Swanson silicone (1)                      | 16 (18)                               | Arthroplasty                | 65.9             | 15.2              | 10           |
| Lirette et al 1995      | Retrospective Cohort           | Biaxial (3)                               | 13 (15)                               | Arthroplasty                | 59               | 4.5               | 12           |
| Masada et al 2003       | Prospective Cohort             | Intramedullary                            | 16 (18)                               | Arthrodesis                 | 58               | 2.25              | 10           |
| Murphy et al 2003       | Prospective Comparative Cohort | Dorsal plate, pin, or rod fixation        | Arthrodesis – 23 (27)                 | Arthrodesis vs Arthroplasty | 51.5             | 3.1               | 18           |
|                         |                                | Universal (3)                             | Arthroplasty – 22 (24)                |                             |                  |                   |              |

|                       |                                     |                            |                           |                                   |      |      |    |
|-----------------------|-------------------------------------|----------------------------|---------------------------|-----------------------------------|------|------|----|
| Onuma et al 2015      | Retrospective Cohort                | Wrist fusion rod           | 4 (6)                     | Arthrodesis                       | 56   | 3.6  | 14 |
| Pfanner et al 2017    | Retrospective Cohort                | Universal 2 (4)            | 22 (23)                   | Arthroplasty                      | 54.9 | 6.86 | 13 |
| Radmer et al 2003     | Retrospective Cohort                | APH (3)                    | 40 (40)                   | Arthroplasty                      | 48   | 4.36 | 11 |
| Radmer et al 1999     | Retrospective Cohort                | Uncemented (3)             | 30 (30)                   | Arthroplasty                      | 49.3 | 1.5  | 12 |
| Rauhaniemi et al 2005 | Retrospective Cohort                | Intramedullary             | 115 (115)                 | Arthrodesis                       | 56   | 4    | 14 |
| Rehak et al 2000      | Retrospective Cohort                | Plate or pin fixation      | 57 (57)                   | Arthrodesis                       | 55   | 2.42 | 9  |
| Summers et al 1984    | Retrospective Cohort                | Swanson (1)<br>Meuli (1)   | 10 (12)                   | Arthroplasty                      | 54.6 | 3.4  | 13 |
| Takwale et al 2002    | Retrospective Cohort                | Biaxial (3)                | 63 (66)                   | Arthroplasty                      | 59.3 | 4.33 | 12 |
| Toma et al 2007       | Retrospective Cohort                | Mannerfeldt or<br>AO plate | 37 (42)                   | Arthrodesis                       | 47.4 | 6.33 | 10 |
| Vahvanen et al 1984   | Retrospective Cohort                | Modified Mannerfeldt       | 38 (45)                   | Arthrodesis                       | 50.1 | 3.9  | 8  |
| Vicar et al 1986      | Retrospective<br>Comparative Cohort | Millender/Nalebuff         | Arthrodesis – 24<br>(33)  | Arthrodesis<br>vs<br>Arthroplasty | 51.7 | 5.44 | 21 |
|                       |                                     | Swanson (1)                | Arthroplasty – 28<br>(37) |                                   |      |      |    |
| Ward et al 2011       | Prospective Cohort                  | Universal (3)              | 15 (19)                   | Arthroplasty                      | NS   | 7.3  | 13 |

NS – Not stated

Online Table S3. Summary of pain findings included in studies.

| Study                 | Number of patients (number of wrists) | Surgical Intervention | Preoperative pain*                                            | Postoperative pain*                                           | Pain scoring system                                                  |
|-----------------------|---------------------------------------|-----------------------|---------------------------------------------------------------|---------------------------------------------------------------|----------------------------------------------------------------------|
| Masada et al 2003     | 16 (18)                               | Arthrodesis           | Present in all patients                                       | No pain reported                                              | Pain present<br>No pain                                              |
| Onuma et al 2015      | 4 (6)                                 | Arthrodesis           | 8                                                             | 1                                                             | 0 – 10 point system<br>0 = no pain<br>10 = severe pain               |
| Rauhaniemi et al 2005 | 115 (115)                             | Arthrodesis           | 3.6                                                           | 1.9                                                           | 1 – no pain<br>2 – mild pain<br>3 – moderate pain<br>4 – severe pain |
| Toma et al 2007       | 37 (42)                               | Arthrodesis           | NS                                                            | None: 24<br>Mild: 17<br>Moderate: 0<br>Severe: 1              | None<br>Mild<br>Moderate<br>Severe                                   |
| Vicar et al 1986      | 24 (33)*                              | Arthrodesis           | None: 0<br>Mild: 3<br>Slight: 14<br>Moderate: 7<br>Severe: 9  | None: 22<br>Mild: 10<br>Slight: 1<br>Moderate: 0<br>Severe: 0 | None<br>Mild<br>Slight                                               |
|                       | 28 (37)                               | Arthroplasty          | None: 0<br>Mild: 3<br>Slight: 9<br>Moderate: 15<br>Severe: 10 | None: 25<br>Mild: 8<br>Slight: 4<br>Moderate: 0<br>Severe: 0  | Moderate<br>Severe                                                   |

|                            |           |              |                                                                      |                                                                    |                                                                                         |
|----------------------------|-----------|--------------|----------------------------------------------------------------------|--------------------------------------------------------------------|-----------------------------------------------------------------------------------------|
| Cobb et al 1996            | 52 (64)   | Arthroplasty | None: 1<br>Mild: 10<br>Moderate: 27<br>Severe: 21<br>Not recorded: 5 | None: 46<br>Mild: 9<br>Moderate: 2<br>Severe: 0<br>Not recorded: 7 | None<br>Mild<br>Moderate<br>Severe                                                      |
| Figgie, H.E. et al<br>1988 | 32 (38)   | Arthroplasty | NS                                                                   | None or slight – 35<br>Moderate – 1<br>Severe – 2                  | None<br>Mild<br>Moderate<br>Severe                                                      |
| Figgie, M. et al<br>1990   | 26 (35)   | Arthroplasty | 25                                                                   | 48                                                                 | 0 – 50 point system<br>0 = severe pain<br>50 = no pain                                  |
| Harlingen et al<br>2014    | 29 (32)   | Arthroplasty | NS                                                                   | 0                                                                  | 0 – 10 point system<br>0 = no pain<br>10 = severe pain                                  |
| Herzberg et al<br>2012     | 129 (129) | Arthroplasty | NS                                                                   | 48 improvement                                                     | Visual analogue scale<br>0 – 100 points                                                 |
| Kistler et al<br>2005      | 16 (18)   | Arthroplasty | 6.5                                                                  | 1.8                                                                | Visual analogue scale<br>0 = no pain<br>10 = severe pain                                |
| Lirette et al<br>1995      | 13 (15)   | Arthroplasty | NS                                                                   | 50                                                                 | Hospital for Special Surgery<br>Wrist Scoring System<br>0 = severe pain<br>50 = no pain |
| Pfanner et al<br>2017      | 22 (23)   | Arthroplasty | 9                                                                    | 0.82                                                               | Visual analogue scale<br>0 = no pain<br>10 = severe pain                                |
| Radmer et al<br>2003       | 40 (40)   | Arthroplasty | NS                                                                   | None: 35<br>Moderate: 5<br>Severe: 0                               | None<br>Moderate<br>Severe                                                              |

|                       |         |              |      |                                                                     |                                                                                              |
|-----------------------|---------|--------------|------|---------------------------------------------------------------------|----------------------------------------------------------------------------------------------|
| Radmer et al<br>1999  | 30 (30) | Arthroplasty | NS   | None: 26<br>Moderate: 4<br>Severe: 0                                | None<br>Moderate<br>Severe                                                                   |
| Summers et al<br>1984 | 10 (12) | Arthroplasty | 2.75 | 0.41                                                                | 0 – 3 point system<br>0 = no pain<br>1 = slight pain<br>2 = moderate pain<br>3 = severe pain |
| Takwale et al<br>2002 | 63 (66) | Arthroplasty | NS   | None: 41<br>Mild: 9<br>Moderate: 11<br>Severe: 0<br>Not reported: 2 | None<br>Mild<br>Moderate<br>Severe                                                           |

\*numerical values represent the mean for entire patient pool unless otherwise stated.  
Stand-alone values represent the mean score in their corresponding pain scale assessment

Online Table S4. Summary of mean range of motion for arthrodesis and arthroplasty.

| Study                   | Flexion/extension |         | Radial/ulnar deviation |         | Pronation/supination |         | Surgical modality |
|-------------------------|-------------------|---------|------------------------|---------|----------------------|---------|-------------------|
|                         | Pre-op            | Post-op | Pre-op                 | Post-op | Pre-op               | Post-op |                   |
| Rehak et al 2000        | NS                | 3°      | NS                     | 3°      | NS                   | NS      | Arthrodesis       |
| Vicar et al 1986        | 53°               | 3°      | 22°                    | 4°      | 135°                 | 145°    | Arthrodesis       |
| Cobb et al 1996         | 57°               | 65°     | 21°                    | 30°     | 134°                 | 141°    | Arthroplasty      |
| Divelbiss et al 2002    | 48°               | 55°     | 17°                    | 98°     | 138°                 | 168°    | Arthroplasty      |
| Ferreres et al 2011     | NS                | 70°     | NS                     | 27°     | NS                   | NS      | Arthroplasty      |
| Figgie, H.E. et al 1988 | NS                | 38°     | NS                     | 20°     | NS                   | NS      | Arthroplasty      |
| Figgie, M. et al 1990   | 35°               | 50°     | NS                     | 20°     | NS                   | NS      | Arthroplasty      |
| Harlingen et al 2014    | 39°               | 57°     | 9°                     | 29°     | NS                   | NS      | Arthroplasty      |
| Herzberg et al 2012     | NS                | 58°     | NS                     | 29°     | NS                   | NS      | Arthroplasty      |
| Kistler et al 2005      | NS                | 43°     | NS                     | 21°     | NS                   | NS      | Arthroplasty      |
| Lirette et al 1995      | NS                | 70°     | NS                     | NS      | NS                   | NS      | Arthroplasty      |
| Pfanner et al 2017      | NS                | 72°     | NS                     | 25°     | NS                   | NS      | Arthroplasty      |
| Radmer et al 2003       | NS                | 69°     | NS                     | 24°     | NS                   | NS      | Arthroplasty      |
| Radmer et al 1999       | 37°               | 68°     | 21°                    | NS      | 122°                 | 172°    | Arthroplasty      |
| Summers et al 1984      | 44°               | 43°     | NS                     | NS      | NS                   | NS      | Arthroplasty      |
| Takwale et al 2002      | NS                | 46°     | NS                     | 20°     | NS                   | NS      | Arthroplasty      |
| Vicar et al 1986        | 66°               | 61°     | 16°                    | 28°     | 134°                 | 150°    | Arthroplasty      |
| Ward et al 2011         | 48°               | 62°     | 21°                    | 25°     | 104°                 | 154°    | Arthroplasty      |

° = degree, such that 360° denotes a full rotation



Online Table S5. Summary of patient satisfaction reported for arthrodesis and arthroplasty.

| Study                 | Surgical Intervention | Postoperative satisfaction                                                        | Notes                                    |
|-----------------------|-----------------------|-----------------------------------------------------------------------------------|------------------------------------------|
| Onuma et al 2015      | Arthrodesis           | 8.2                                                                               | Not satisfied (0) to very satisfied (10) |
| Rauhaniemi et al 2005 | Arthrodesis           | 9% worse; 6% unchanged; 43% a little better; 42% much better                      | Subjective categorization                |
| Rehak et al 2000      | Arthrodesis           | 100% satisfied                                                                    | Dichotomous categorization               |
| Toma et al 2007       | Arthrodesis           | 21 very satisfied<br>14 satisfied<br>7 unsatisfied                                | Subjective categorization                |
| Cobb et al 1996       | Arthroplasty          | Much better: 29<br>Better: 14<br>Same: 2<br>Worse: 2<br>Not recorded: 17          | Subjective categorization                |
| Ferreres et al 2011   | Arthroplasty          | 100% satisfied                                                                    | Dichotomous categorization               |
| Figgie, M. et al 1990 | Arthroplasty          | Excellent: 20<br>Good: 8<br>Fair: 3<br>Poor: 2<br>Revised: 2                      | Subjective categorization                |
| Harlingen et al 2014  | Arthroplasty          | Very satisfied: 18<br>Satisfied: 9<br>Moderately satisfied: 4<br>Not satisfied: 1 | Subjective categorization                |
| Herzberg et al 2012   | Arthroplasty          | 88% satisfied or very satisfied                                                   | Subjective categorization                |
| Kistler et al 2005    | Arthroplasty          | Excellent: 5<br>Good: 12<br>Satisfactory: 6<br>Poor: 2                            | Subjective categorization                |
| Lirette et al 1995    | Arthroplasty          | 100% satisfied                                                                    | Dichotomous categorization               |
| Radmer et al 1999     | Arthroplasty          | Satisfied: 26<br>Not satisfied: 4                                                 | Subjective categorization                |
| Summers et al 1984    | Arthroplasty          | Highly satisfied: 8<br>Non-committal: 1<br>Disappointed: 3                        | Subjective categorization                |

Online Table S6. Summary of complications.

| Study                   | Surgical intervention | Number of patients (Number of cases) | Description of complications (Number of cases)                                                                                                                                 |
|-------------------------|-----------------------|--------------------------------------|--------------------------------------------------------------------------------------------------------------------------------------------------------------------------------|
| Cobb et al 1996         | Arthroplasty          | 52 (64)                              | Loosening of distal component (8)<br>Infection (1)<br>Dislocation (1)<br>Progressive soft tissue imbalance (1)                                                                 |
| Divelbiss et al 2002    | Arthroplasty          | 19 (22)                              | Palmar dislocation (3)                                                                                                                                                         |
| Ferreres et al 2011     | Arthroplasty          | 14 (14)                              | Wound dehiscence (1)<br>Post-operative bleeding (1)                                                                                                                            |
| Figgie, H.E. et al 1988 | Arthroplasty          | 32 (38)                              | Re-operation for pain (1)<br>Loosening (1)                                                                                                                                     |
| Figgie, M. et al 1990   | Arthroplasty          | 26 (35)                              | Re-operation for pain (1)<br>Loosening (1)                                                                                                                                     |
| Harlingen et al 2014    | Arthroplasty          | 29 (32)                              | Dislocation (7)<br>Infection (3)<br>Limited range of motion (7)<br>Nerve damage (3)                                                                                            |
| Herzberg et al 2012     | Arthroplasty          | 129 (129)                            | Loosening (4)<br>Wrist ankylosis (1)<br>Deep infection (1)<br>Carpal tunnel syndrome (3)                                                                                       |
| Kistler et al 2005      | Arthroplasty          | 18 (18)                              | NS                                                                                                                                                                             |
| Lirette et al 1995      | Arthroplasty          | 13 (15)                              | Dislocation (1)                                                                                                                                                                |
| Masada et al 2003       | Arthrodesis           | 16 (18)                              | K-wire disengagement (2)<br>Carpal tunnel syndrome (2)                                                                                                                         |
| Murphy et al 2003       | Comparative           | Arthrodesis – 23 (27)                | Tendon adhesion (6)<br>Tendon rupture (1)<br>Tenolysis (2)<br>Carpal tunnel syndrome (4)<br>Wound dehiscence (3)<br>CRPS (1)<br>Haematoma (1)<br>Hardware-related fracture (1) |
|                         |                       | Arthroplasty – 22 (24)               | Wound dehiscence (6)<br>Infection (2)<br>Prosthetic instability (4)<br>Carpal tunnel syndrome (2)                                                                              |
| Onuma et al 2015        | Arthrodesis           | 4 (6)                                | Tendon adhesion (1)<br>Rod fracture (1)<br>Proximal metacarpal fracture (1)                                                                                                    |

|                          |              |                           |                                                                                                                                            |
|--------------------------|--------------|---------------------------|--------------------------------------------------------------------------------------------------------------------------------------------|
| Pfanner et al 2017       | Arthroplasty | 22 (23)                   | Implant revision (6)<br>Skin necrosis (1)                                                                                                  |
| Radmer et al 2003        | Arthroplasty | 40 (40)                   | Extensor tendon rupture (2)<br>Prosthetic infection (1)                                                                                    |
| Radmer et al 1999        | Arthroplasty | 30 (30)                   | Dislocation (2)                                                                                                                            |
| Rauhaniemi et al<br>2005 | Arthrodesis  | 115 (115)                 | Radiocarpal joint fusion<br>failure (3)<br>Intraoperative fracture (1)<br>Carpal tunnel syndrome (3)<br>Superficial wound infection<br>(2) |
| Rehak et al 2000         | Arthrodesis  | 57 (57)                   | Loss of distal fixation in<br>metacarpal (1)<br>Radial fracture proximal to<br>plate (1)<br>Discomfort (2)<br>Screw loosening (2)          |
| Summers et al<br>1984    | Arthroplasty | 10 (12)                   | Bony ankylosis (1)<br>Prosthesis subluxation<br>through skin and later<br>infection (1)<br>Radiological evidence of<br>loosening (1)       |
| Takwale et al 2002       | Arthroplasty | 63 (66)                   | Fractures (4)<br>Dislocations (6)<br>CRPS (1)<br>Impingement (2)<br>Stiffness (4)<br>Ulnar instability (1)                                 |
| Toma et al 2007          | Arthrodesis  | 37 (42)                   | Loosening (6)                                                                                                                              |
| Vahvanen et al<br>1984   | Arthrodesis  | 38 (45)                   | Extensor irritation (4)<br>Pin breakage (1)<br>Median nerve paresis (1)                                                                    |
| Vicar et al 1986         | Comparative  | Arthrodesis – 24<br>(33)  | Carpal tunnel syndrome (3)<br>Distal tenderness (2)<br>Haematoma with delayed<br>wound healing (1)                                         |
|                          |              | Arthroplasty – 28<br>(37) | Haematoma (2)<br>Prosthesis misplacement<br>(1)<br>Persistent pain (1)<br>Implant fracture (3)<br>Radial carpal impaction (2)              |
| Ward et al 2011          | Arthroplasty | 15 (19)                   | Delayed wound healing (4)<br>Instability (1)                                                                                               |
